# Supplementary material for: Iron Deficiency: Impact on Functional Capacity and Quality of Life in Heart Failure with Preserved Ejection Fraction
Source: PubMed Central journal article supplement (PMC7230551; doi:10.3390/jcm9041199), 2020-04-22
Supplement: jcm-09-01199-s001.pdf [file jcm-09-01199-s001.pdf]

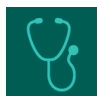

**Table S1.** MLHFQ individual items according to iron deficiency.

|                                                           | Iron deficiency | No iron Deficiency | <i>p</i> value |
|-----------------------------------------------------------|-----------------|--------------------|----------------|
| Minnesota living with heart failure questionnaire (MLHFQ) | <i>N</i> = 325  | <i>N</i> = 122     |                |
| Individual items (min: 0, max: 5)                         |                 |                    |                |
| 1. Swelling of legs                                       | 3.10 ± 2.06     | 2.86 ± 2.08        | 0.29           |
| 2. Having a rest during the day                           | 3.73 ± 1.79     | 3.29 ± 2.03        | 0.036          |
| 3. Walking or climbing stairs                             | 4.00 ± 1.64     | 3.66 ± 1.77        | 0.07           |
| 4. Housekeeping or gardening                              | 3.43 ± 2.04     | 2.83 ± 2.14        | 0.008          |
| 5. Going away                                             | 3.62 ± 1.97     | 3.21 ± 2.06        | 0.06           |
| 6. Sleep                                                  | 2.83 ± 2.09     | 2.38 ± 2.02        | 0.036          |
| 7. Friends or family                                      | 1.84 ± 2.01     | 1.39 ± 1.88        | 0.027          |
| 8. Earning profession                                     | 0.88 ± 1.75     | 0.68 ± 1.54        | 0.25           |
| 9. Hobbies                                                | 2.27 ± 2.09     | 1.75 ± 2.06        | 0.017          |
| 10. Sexual activity                                       | 1.27 ± 1.93     | 1.02 ± 1.80        | 0.19           |
| 11. Appetite                                              | 2.32 ± 2.03     | 2.11 ± 2.05        | 0.32           |
| 12. Feeling short of breath                               | 3.68 ± 1.83     | 3.40 ± 1.94        | 0.17           |
| 13. Feeling fatigued                                      | 3.97 ± 1.61     | 3.78 ± 1.77        | 0.31           |
| 14. Stay in hospital                                      | 3.42 ± 2.09     | 3.06 ± 2.16        | 0.11           |
| 15. Cost of medical care                                  | 0.61 ± 1.36     | 0.48 ± 1.21        | 0.36           |
| 16. Side effects drugs                                    | 0.25 ± 0.84     | 0.29 ± 0.89        | 0.71           |
| 17. Burden for relatives                                  | 1.35 ± 1.72     | 1.20 ± 1.75        | 0.40           |
| 18. Loss of self-control                                  | 1.26 ± 1.73     | 1.16 ± 1.79        | 0.58           |
| 19. Worried                                               | 2.76 ± 1.89     | 2.43 ± 1.87        | 0.10           |
| 20. Concentration                                         | 1.12 ± 1.59     | 0.82 ± 1.42        | 0.06           |
| 21. Depression                                            | 1.66 ± 1.86     | 1.30 ± 1.62        | 0.041          |

Data presented as mean ± SD.

**Table S2.** Baseline characteristics of HFpEF patients according to LVEF.

|                                                 | LVEF >60%<br>N = 220 (49%) | LVEF ≤60%<br>N = 227 (51%) | p value |
|-------------------------------------------------|----------------------------|----------------------------|---------|
| Age (years)                                     | 76.5 ± 9.2                 | 75.0 ± 9.2                 | 0.09    |
| Female sex                                      | 151 (68.3)                 | 113 (49.8)                 | <0.001  |
| BMI (kg/m <sup>2</sup> )                        | 29.4 ± 6.3                 | 28.8 ± 6.1                 | 0.31    |
| LVEF (%)                                        | 68.5 ± 5.5                 | 56.0 ± 3.4                 | <0.001  |
| Ischemic etiology of CHF                        | 38 (17.0)                  | 64 (27.5)                  | 0.01    |
| NYHA functional class                           |                            |                            |         |
| I                                               | 24 (10.9)                  | 23 (10.1)                  | 0.91    |
| II                                              | 89 (40.5)                  | 104 (45.8)                 | 0.29    |
| III                                             | 88 (40.0)                  | 78 (34.4)                  | 0.26    |
| IV                                              | 19 (8.6)                   | 19 (8.4)                   | 0.99    |
| Comorbidities                                   |                            |                            |         |
| Hypertension                                    | 201 (90.1)                 | 198 (85.0)                 | 0.13    |
| COPD                                            | 47 (21.4)                  | 46 (20.3)                  | 0.87    |
| Diabetes mellitus                               | 102 (55.7)                 | 121 (51.9)                 | 0.22    |
| Chronic kidney disease                          | 136 (61.0)                 | 151 (64.8)                 | 0.49    |
| Anaemia                                         | 127 (57.0)                 | 127 (54.5)                 | 0.63    |
| Iron deficiency (KDOQI)                         | 166 (74.4)                 | 159 (69.2)                 | 0.24    |
| Dependency                                      | 78 (35.0)                  | 68 (29.2)                  | 0.39    |
| Medications                                     |                            |                            |         |
| ACEIs or ARBs                                   | 155 (69.5)                 | 149 (63.9)                 | 0.30    |
| Beta-blockers                                   | 173 (77.6)                 | 187 (80.3)                 | 0.56    |
| MRAs                                            | 17 (7.6)                   | 35 (15.0)                  | 0.019   |
| Digoxin                                         | 35 (15.7)                  | 39 (16.7)                  | 0.86    |
| Loop diuretics                                  | 208 (93.3)                 | 212 (91.0)                 | 0.46    |
| Statins                                         | 119 (53.4)                 | 133 (57.1)                 | 0.48    |
| Antiplatelets                                   | 72 (32.3)                  | 86 (36.9)                  | 0.35    |
| Anticoagulants                                  | 133 (59.6)                 | 133 (57.1)                 | 0.65    |
| Laboratory values                               |                            |                            |         |
| Hemoglobin (g/dL)                               | 12.0 ± 1.9                 | 12.3 ± 1.9                 | 0.16    |
| eGFR (mL/min/1.73m <sup>2</sup> )               | 55.4 ± 24.6                | 55.2 ± 23.0                | 0.95    |
| Ferritin (ng/mL)                                | 135 [67.8-260.5]           | 158 [72.5-290.5]           | 0.26    |
| Transferrin (mg/dL)                             | 253.9 ± 53.1               | 242.4 ± 49.5               | 0.018   |
| Serum iron (pg/dL)                              | 58.8 ± 28.4                | 64.7 ± 36.6                | 0.06    |
| TSAT (%)                                        | 17.2 ± 8.7                 | 20.0 ± 13.0                | 0.008   |
| Ferritin index                                  | 0.99 ± 0.9                 | 0.89 ± 0.5                 | 0.14    |
| sTfR (mg/L)                                     | 1.87 ± 0.8                 | 1.83 ± 0.8                 | 0.67    |
| NT-proBNP (pg/mL)                               | 1223 [595-2855]            | 1319.5 [715-3108]          | 0.39    |
| C-reactive protein (mg/dL)                      | 0.8 [0.3-1.8]              | 0.8 [0.3-2.1]              | 0.96    |
| 6MWT (meters walked)                            | 274.3 ± 87.4               | 288.0 ± 109.3              | 0.24    |
| MLHFQ, Overall summary score (min: 0, max: 105) | 50.1 ± 22.0                | 45.8 ± 23.2                | 0.044   |

Data presented as mean ± SD, N (%) or median [interquartile range]. 6MWT (& minute walking test), ACEI (angiotensin converting enzyme inhibitor), ARB (angiotensin receptor blocker), BMI (body mass index), BP (blood pressure), CHF (chronic heart failure), COPD (chronic obstructive pulmonary disease), eGFR (estimated glomerular filtration rate), HFpEF (heart failure with preserved ejection fraction), ID (iron deficiency), LVEF (left ventricular ejection fraction), MLHFQ (Minnesota Living with Heart Failure Questionnaire), MRA (mineralocorticoid receptor antagonist), NT-proBNP (N-terminal pro-B type natriuretic peptide), NYHA (New York Heart Association), sTfR (serum soluble transferrin receptor), TSAT (transferrin saturation). Dependency defined as Barthel test score <90 points.
